# Supplementary material for: A mathematical model of iron import and trafficking in wild-type and Mrs3/4ΔΔ yeast cells
Source: BMC Syst Biol. 2019 Feb 21;13:23. doi: 10.1186/s12918-019-0702-2 (PMC6385441; doi:10.1186/s12918-019-0702-2)
Supplement: Supplementary file 1 — This file includes ODEs for the different model variants. (DOCX 61 kb) [file 12918_2019_702_MOESM1_ESM.docx]

**Additional file 1**

**ODE for the C1 Model:**

**ODEs for the C3 Model:**

and equations (S6) and (S7) to obtain [C].

**ODEs for the C4 Model**

and equations (S4) and (S5) to obtain [Femit] and [Fevac].

**ODEs for the C9 Model:**

Equations (S6) and (S7) and...
